# Supplementary material for: Built-in electric field induced interfacial charge distributions of Ni2P/NiSe2 heterojunction for urea-assisted hydrogen evolution reaction
Source: Royal Society of Chemistry journal article supplement (doi:10.1039/d3qi01459b), 2023-01-01
Supplement: d3qi01459b1.pdf [file d3qi01459b1.pdf]

## Electronic Supporting Information (ESI)

### Built-in Electric Field Induced Interfacial Charge Distributions of Ni<sub>2</sub>P/NiSe<sub>2</sub> Heterojunction for Urea-Assisted Hydrogen Evolution Reaction

*Yiqiang Sun<sup>#,a</sup>, Wenwen Cao<sup>#,a</sup>, Xuening Ge<sup>a</sup>, Xiaodong Yang<sup>a</sup>, Yong Wang<sup>b</sup>, Yuan  
Xu<sup>b</sup>, Bo Ouyang<sup>\*c</sup>, Qi Shen<sup>\*a</sup>, Cuncheng Li<sup>\*a</sup>*

Prof. Y. Q. Sun, Dr. W. W. Cao, X. N. Ge, X. D. Yang, C. C. Wang, Q. Shen, Prof. C.  
C. Li

School of Chemistry and Chemical Engineering, University of Jinan, Jinan, 250055, P.  
R. China

Dr. Y Wang, Prof. Y. Xu

Hongyuan Waterproof Technology Group Co., Ltd, 250055, P. R. China

Dr. Bo Ouyang

MIIT Key Laboratory of Semiconductor Microstructure and Quantum Sensing, Nanjing  
University of Science and Technology, Nanjing 210094, P. R. China.

E-mail: [ouyangboyi@njust.edu.cn](mailto:ouyangboyi@njust.edu.cn); [chm\\_shenq@ujn.edu.cn](mailto:chm_shenq@ujn.edu.cn); [chm\\_licc@ujn.edu.cn](mailto:chm_licc@ujn.edu.cn)

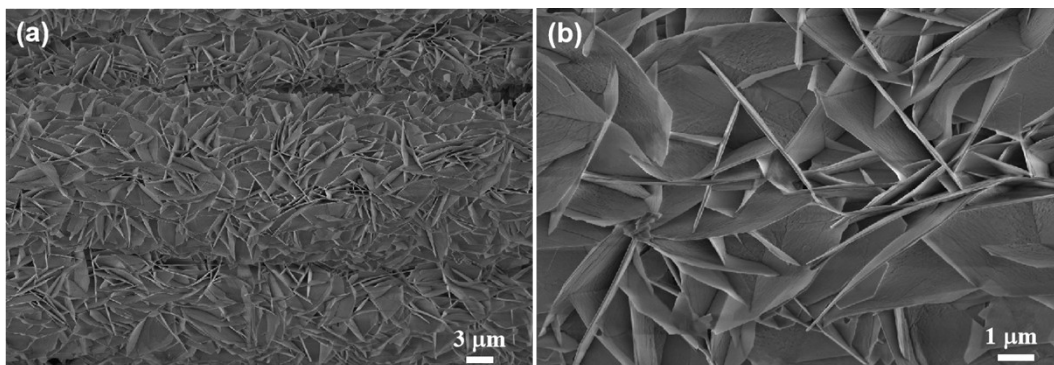

**Fig. S1** (a) Low-magnification SEM image and (b) High-magnification SEM image of Ni(OH)<sub>2</sub>/CFC nanosheet arrays precursor.

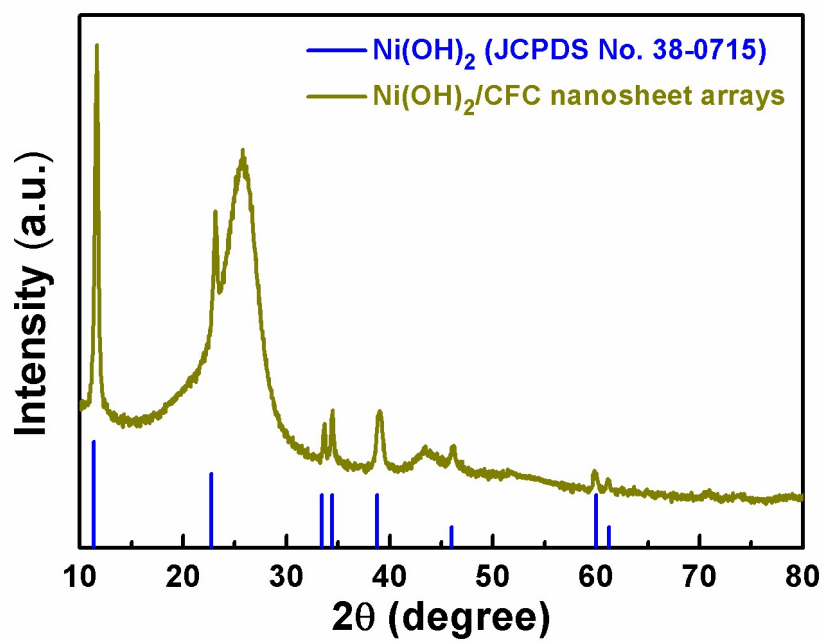

**Fig. S2** XRD pattern of Ni(OH)<sub>2</sub>/CFC nanosheet arrays precursor.

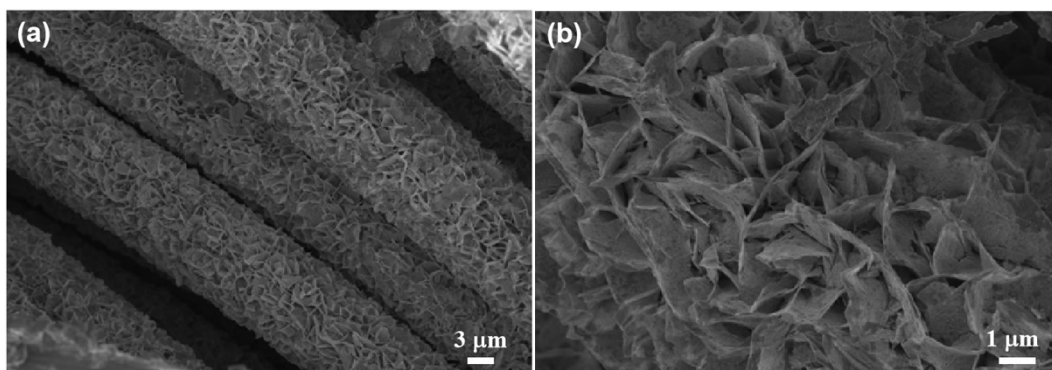

**Fig. S3** (a) Low-magnification SEM image and (b) High-magnification SEM image of  $\text{Ni}_2\text{P}/\text{CFC}$  nanosheet arrays.

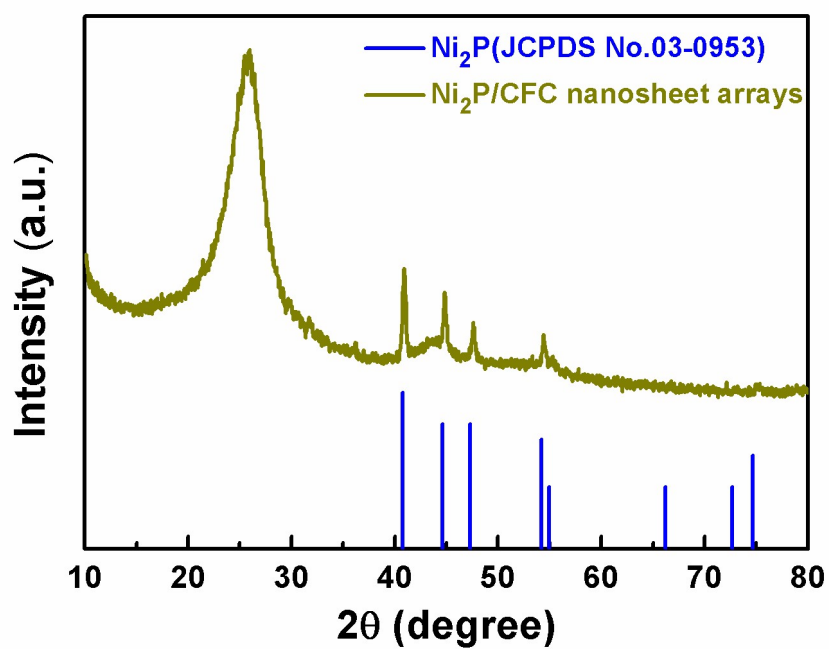

**Fig. S4** XRD pattern of  $\text{Ni}_2\text{P}/\text{CFC}$  nanosheet arrays.

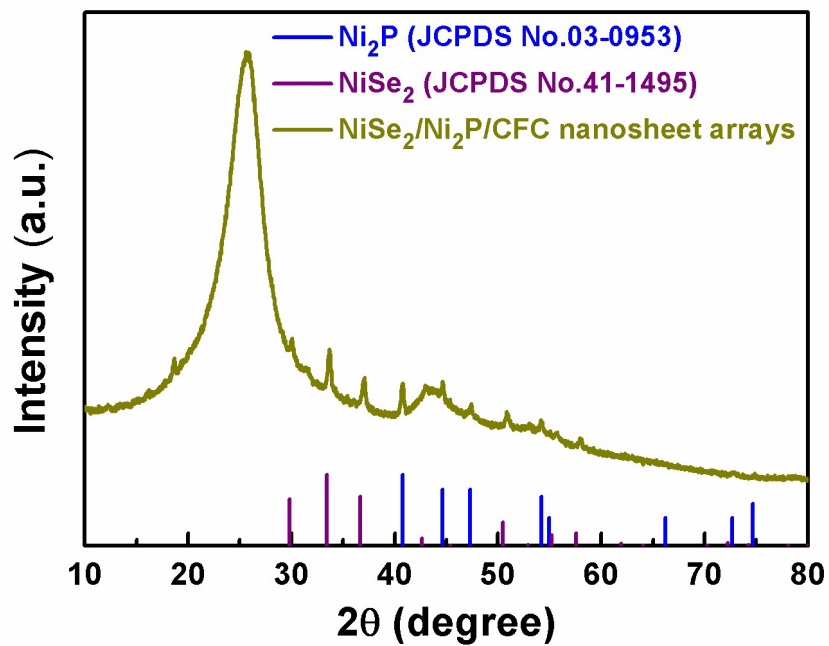

Fig. S5 XRD pattern of Ni<sub>2</sub>P/NiSe<sub>2</sub>/CFC heterogeneous nanosheet arrays.

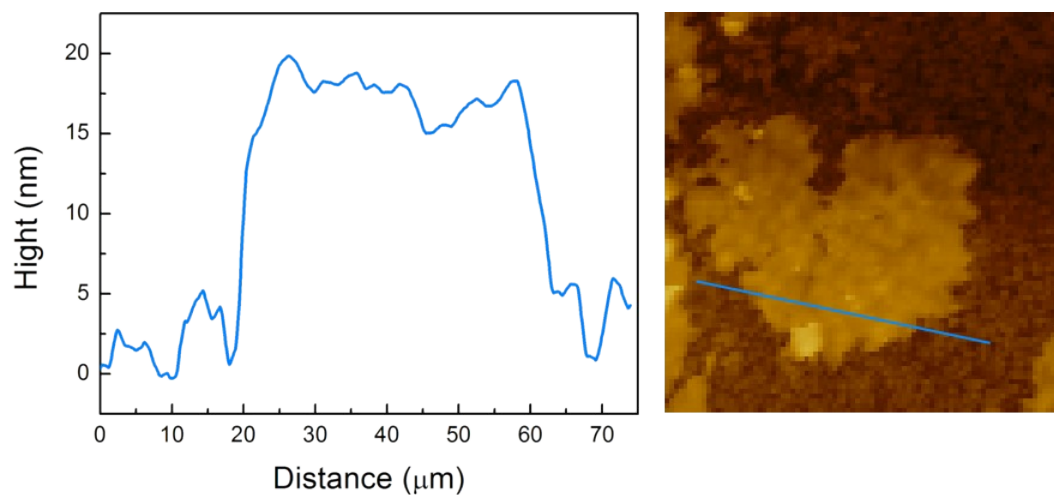

Fig. S6 AFM image and the corresponding height profiles of Ni<sub>2</sub>P/NiSe<sub>2</sub> nanosheets for the thickness measurements.

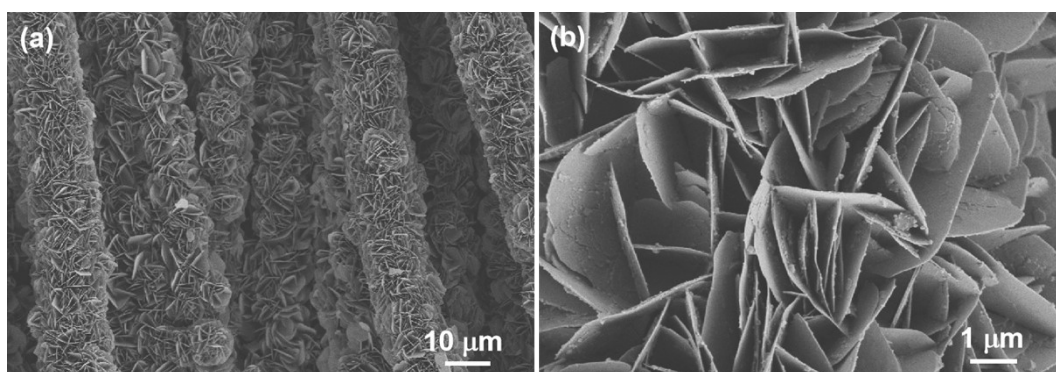

**Fig. S7** (a) Low-magnification SEM image and (b) High-magnification SEM image of NiSe<sub>2</sub>/CFC nanosheet arrays.

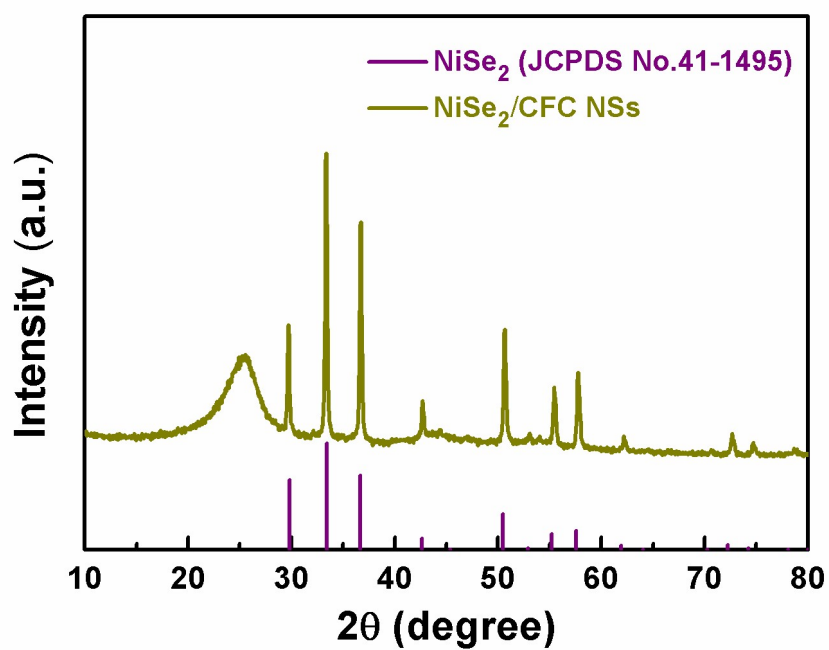

**Fig. S8** XRD pattern of pristine NiSe<sub>2</sub>/CFC nanosheet arrays.

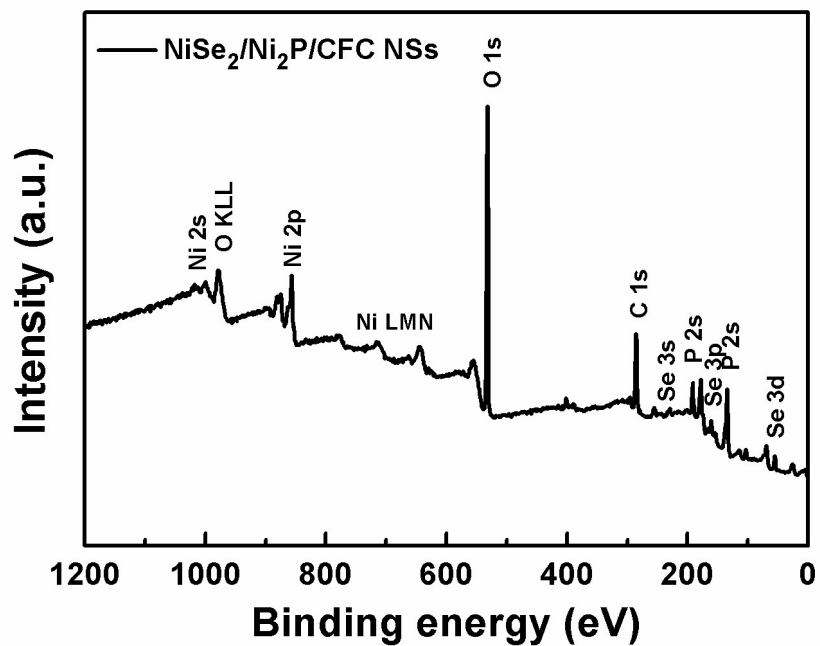

**Fig. S9** The XPS survey spectrum of Ni<sub>2</sub>P/NiSe<sub>2</sub>/CFC heterogeneous nanosheet arrays.

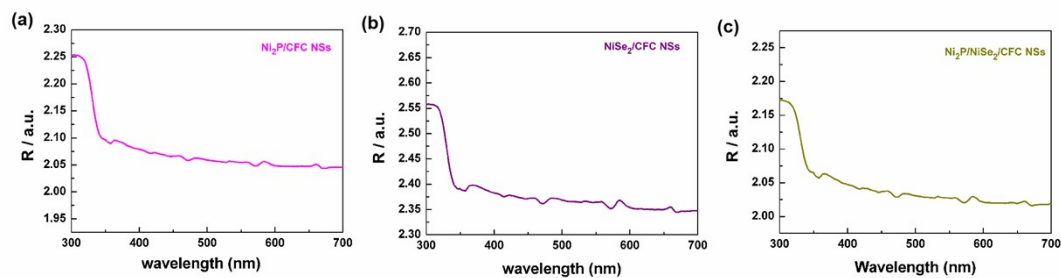

**Fig. S10** UV-VIS diffuse reflectance spectra of (a) Ni<sub>2</sub>P/CFC NSs, (b) NiSe<sub>2</sub>/CFC NSs and Ni<sub>2</sub>P/NiSe<sub>2</sub>/CFC NSs at different scan rates in 1 M KOH.

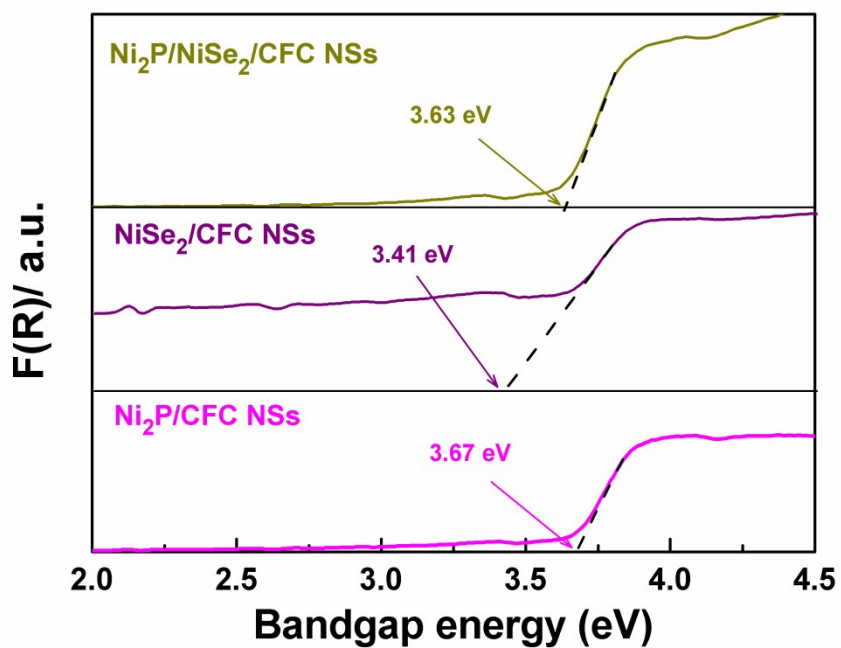

Fig. S11 UV/Vis spectra.

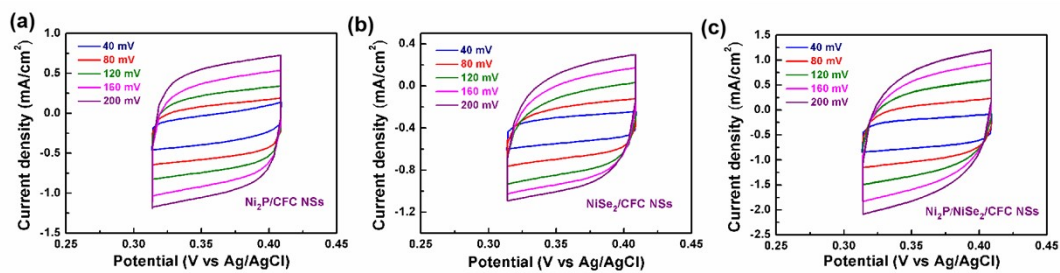

Fig. S12 Cyclic voltammograms of (a)  $\text{Ni}_2\text{P}/\text{CFC NSs}$ , (b)  $\text{NiSe}_2/\text{CFC NSs}$  and  $\text{Ni}_2\text{P}/\text{NiSe}_2/\text{CFC NSs}$  at different scan rates in 1 M KOH.

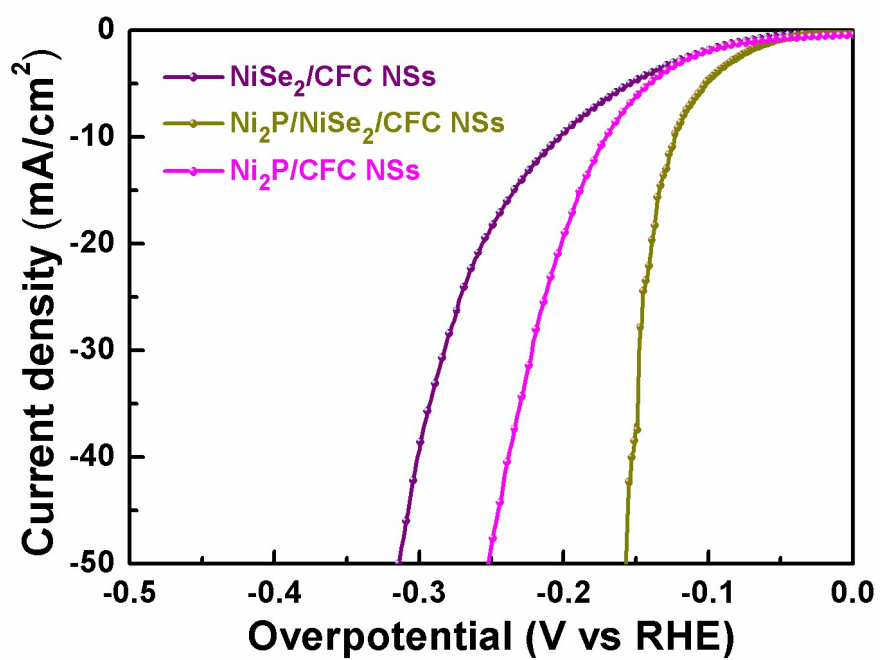

Fig. S13 HER polarization curves normalized by  $C_{dl}$ .



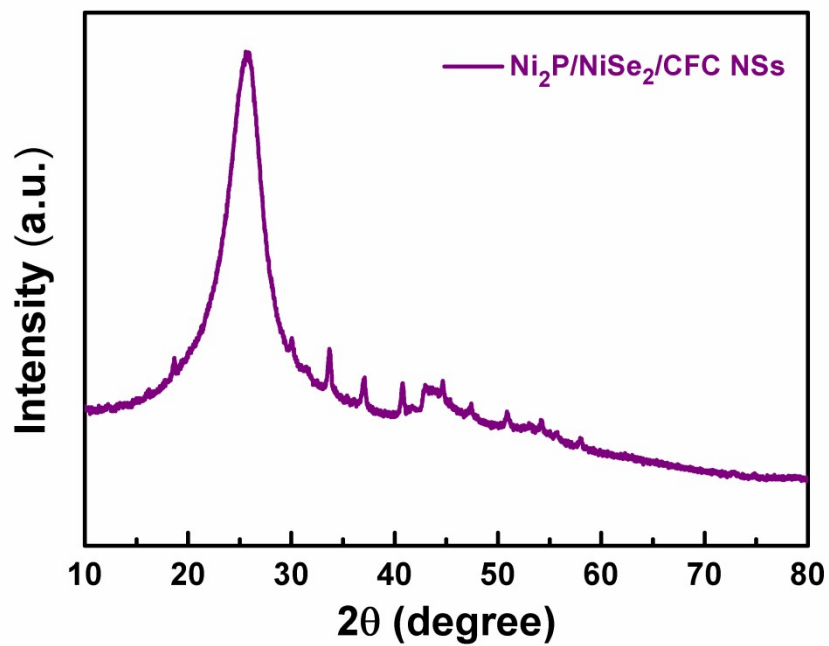

**Fig. S14** XRD pattern of Ni<sub>2</sub>P/NiSe<sub>2</sub>/CFC NSs after durability test.

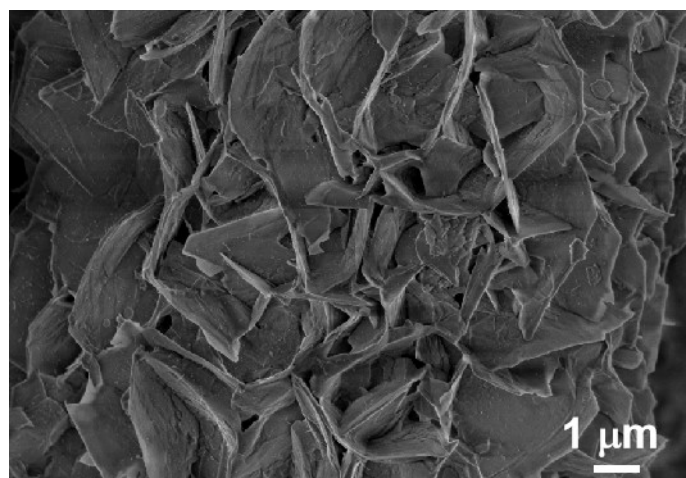

**Fig. S15** SEM image of Ni<sub>2</sub>P/NiSe<sub>2</sub>/CFC NSs after durability test.

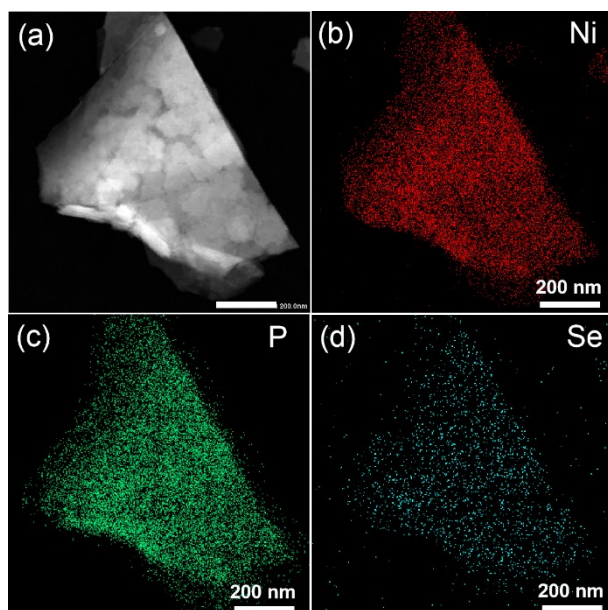

**Fig. S16** Elemental mapping images of  $\text{Ni}_2\text{P}/\text{NiSe}_2/\text{CFC}$  NSs after OER durability test.

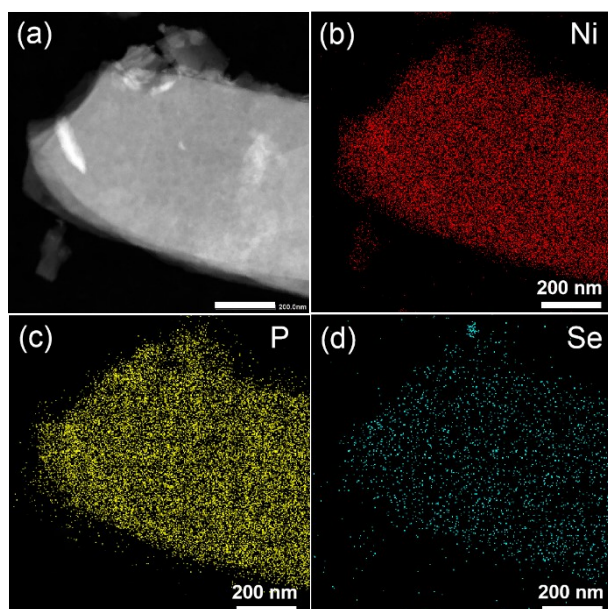

**Fig. S17** Elemental mapping images of  $\text{Ni}_2\text{P}/\text{NiSe}_2/\text{CFC}$  NSs after uor durability test.

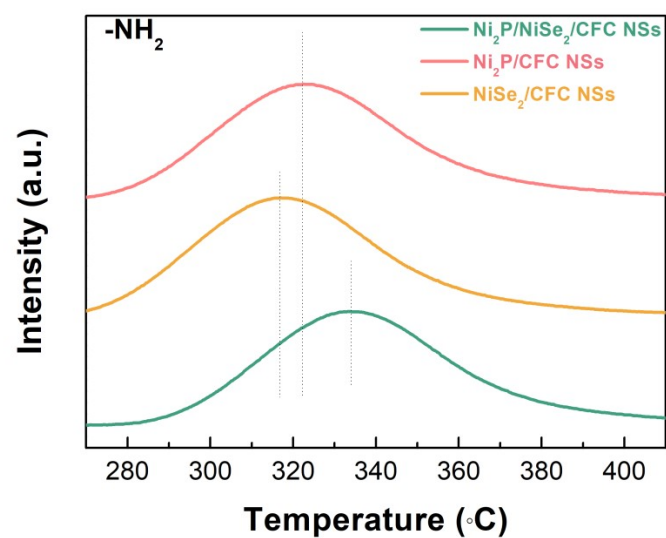

**Fig. S18** TPD adsorption spectra of Ni<sub>2</sub>P/CFC NSs, NiSe<sub>2</sub>/CFC NSs, and Ni<sub>2</sub>P/NiSe<sub>2</sub>/CFC NSs in butylamine/He.

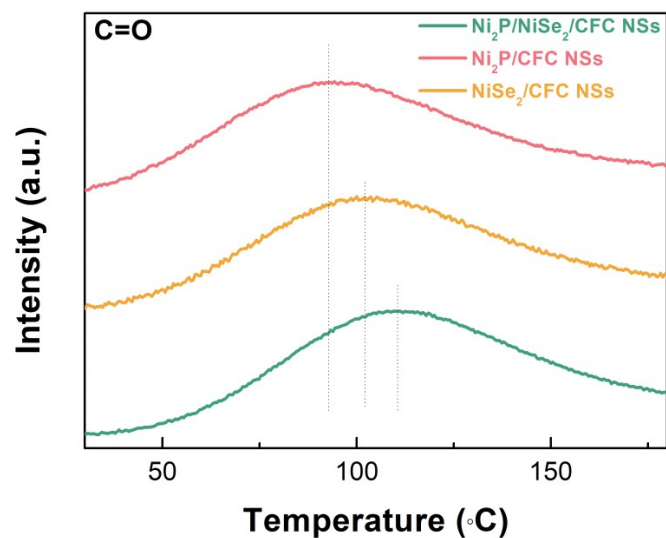

**Fig. S19** TPD adsorption spectra of Ni<sub>2</sub>P/CFC NSs, NiSe<sub>2</sub>/CFC NSs, and Ni<sub>2</sub>P/NiSe<sub>2</sub>/CFC NSs in CO atmospheres.

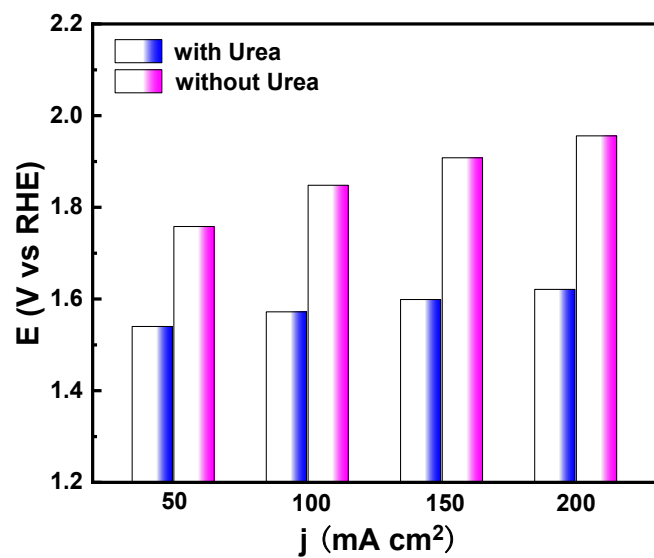

**Fig. S20** Comparison for cell voltages of Ni<sub>2</sub>P/NiSe<sub>2</sub>/CFC NSs to deliver different current densities for water and urea electrolysis.

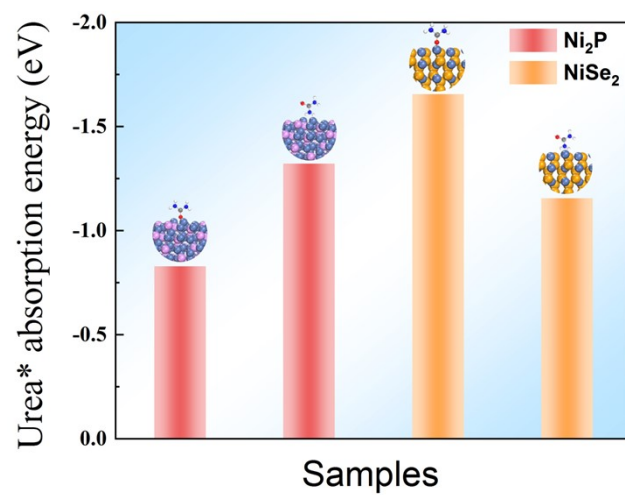

**Fig. S21** Comparison of the adsorption energies of -NH<sub>2</sub> and CO groups in urea molecules adsorbed on Ni<sub>2</sub>P and NiSe<sub>2</sub>.

|           | <b>0 h</b>   | <b>12 h</b>  | <b>24 h</b>  |
|-----------|--------------|--------------|--------------|
| <b>pH</b> | <b>13.96</b> | <b>13.91</b> | <b>13.88</b> |

**Table S1.** Electrolyte pH changes with long-term stability test time.
